# Supplementary material for: Atrophic Gastritis and Autoimmunity: Results from a Prospective, Multicenter Study
Source: MDPI journal article supplement (doi:10.3390/diagnostics13091599), 2023-04-30
Supplement: s1 [file s1]

## Supplementary Materials

**Table S1.** Seropositivity of myositis antibodies in patients with CAG and control patients.

| Myositis-related antibody                         | AIG (n = 45) | NAIG (n = 109) | Control (n = 201) | Total (n = 355) |
|---------------------------------------------------|--------------|----------------|-------------------|-----------------|
| Ro52 n (%)                                        | 1 (2.2)      | 1 (0.9)        | 3 (1.5)           | 5 (1.4)         |
| OJ                                                | 0            | 2 (1.9)        | 0                 | 2 (0.6)         |
| EJ                                                | 0            | 0              | 0                 | 0               |
| PL12                                              | 0            | 1 (0.9)        | 4 (2.0)           | 5 (1.4)         |
| PL7                                               | 1 (2.2)      | 1 (0.9)        | 2 (1.0)           | 4 (1.1)         |
| SRP                                               | 1 (2.2)      | 2 (1.9)        | 0                 | 3 (0.9)         |
| Jo1                                               | 1 (2.2)      | 2 (1.9)        | 1 (0.5)           | 4 (1.1)         |
| PM75                                              | 2 (4.4)      | 5 (4.7)        | 9 (4.5)           | 16 (4.5)        |
| PM100                                             | 0            | 3 (2.8)        | 2 (1.0)           | 5 (1.4)         |
| Ku                                                | 0            | 0              | 2 (1.0)           | 2 (0.6)         |
| SAE1                                              | 0            | 1 (0.9)        | 0 (0.0)           | 1 (0.3)         |
| NXP2                                              | 1 (2.2)      | 0              | 0                 | 1 (0.3)         |
| MDA5                                              | 0            | 0              | 1 (0.5)           | 1 (0.3)         |
| TIF1g                                             | 1 (2.3)      | 0              | 1 (0.5)           | 2 (0.6)         |
| Mi2a                                              | 0            | 0              | 0                 | 0               |
| Mi2b                                              | 0            | 1 (0.95)       | 1 (0.5)           | 2 (0.6)         |
| At least one antibody equivocal or positive n (%) | 7 (14.3)     | 15 (15.6)      | 26 (12.9)         | 48 (13.6)       |
| At least one positive antibody n (%)              | 4 (8.9)      | 6 (5.5)        | 9 (4.4)           | 19 (5.3)        |

AIG, Autoimmune Gastritis; NAIG, Non-autoimmune Gastritis; Seropositivity for myositis-associated antibodies: negative <10, equivocal > 10, positive >25. For every antibody presented seropositivity is for >10, values are presented as n (%).

**Table S2** ANA concentrations in patients with CAG and control patients.

| ANA                           | AIG (n = 45)     | NAIG (n = 109)   | p-value      | Control (n = 201) | Total (n = 355) |
|-------------------------------|------------------|------------------|--------------|-------------------|-----------------|
| Negative                      | 21 (46.7)        | 64 (59.8)        |              | 125 (62.5)        | 210 (59.7)      |
| Equivocal                     | 3 (6.7)          | 12 (11.2)        |              | 21 (10.5)         | 36 (10.2)       |
| Weakly positive               | 10 (22.2)        | 14 (13.1)        |              | 21 (10.5)         | 45 (12.8)       |
| positive                      | 10 (22.2)        | 13 (12.1)        |              | 26 (12.8)         | 49 (13.9)       |
| Strongly positive             | 1 (2.2)          | 4 (3.7)          |              | 7 (3.5)           | 12 (3.4)        |
| All positive results combined | <b>21 (46.7)</b> | <b>31 (29.0)</b> | <b>0.033</b> | 54 (27.0)         | 106 (30.1)      |

AIG, Autoimmune Gastritis; NAIG, Non-autoimmune Gastritis; ANA, anti-nuclear antibodies; ANA results: negative dilution <1:80; equivocal 1:80; weakly positive 1:160; positive for 1:320 or 1:640; strongly positive for the dilution ≥1:1280. Values are presented as n (%).
